# Supplementary material
Source: PubMed Central journal article supplement (PMC7781457)
Supplement: djaa061_supplementary_data.pdf [file djaa061_supplementary_data.pdf]

Supplementary Figure 1. Exceptional responder sample analyte overview. Here we show the samples from which DNA and RNA was isolated for each of the ER cases. Sample analyte evaluation was attempted on 126 subjects. Of 126 subjects 7 were duplicate samples, and 2 were withdrawn from the project with manuscript in revision. To be counted as a valid analysis, at least 1 tumor sample had to have a successful DNA sequence by either whole exome or the FoundationOne panel. Six patients were failed for lack of DNA, but any successful RNAseq from these patients would be kept as controls. Color legend: **Gray** highlight at far right indicates tracks where tumor WES was performed. **Green** cells are successfully sequenced samples, using WES or RNA Seq. **Red** cells samples failed sequencing usually at the library stage. **Orange** highlight indicates specimens in which analyte evaluation was unsuccessful (10 cases failed). 17 normal RNAs were sequenced to furnish controls

Supplemental Table 1: Reviewers for exceptional responder cases

| Specialty                      | Name                          | Affiliation                                                     |
|--------------------------------|-------------------------------|-----------------------------------------------------------------|
| Medical Oncology               | Barbara A. Conley MD          | Division of Cancer Treatment and Diagnosis, NCI                 |
| Medical Oncology               | JoAnne Zujewski MD            | Division of Cancer Treatment and Diagnosis, NCI                 |
| Pediatric/Medical Oncology     | S. Percy Ivy, MD              | Division of Cancer Treatment and Diagnosis, NCI                 |
| Medical Oncology               | Naoko Takebe MD               | Division of Cancer Treatment and Diagnosis, NCI                 |
| Medical Oncology               | Jeffrey White MD              | Division of Cancer Treatment and Diagnosis, NCI                 |
| Medical Oncology               | Geraldine O'Sullivan-Coyne MD | Developmental Therapeutics Clinic, NCI                          |
| Medical Oncology               | Elise Kohn, MD                | Division of Cancer Treatment and Diagnosis, NCI                 |
| Medical Oncology               | Richard Little MD             | Division of Cancer Treatment and Diagnosis, NCI                 |
| Medical Oncology               | Shakun Malik, MD              | Division of Cancer Treatment and Diagnosis, NCI                 |
| Medical Oncology               | Lyndsay Harris, MD            | Division of Cancer Treatment and Diagnosis, NCI                 |
| Medical Oncology               | Bhupinder Mann, MD            | Division of Cancer Treatment and Diagnosis, NCI                 |
| Pathology                      | Irina Lubensky MD             | Division of Cancer Treatment and Diagnosis, NCI                 |
| Molecular Oncology             | Jean-Claude Zenklusen PhD     | Center for Cancer Genomics, NCI                                 |
| Molecular Oncology             | Paul M. Williams, PhD         | Frederick National Laboratory for Cancer Research, Frederick MD |
| Molecular oncology             | James V. Tricoli PhD          | Division of Cancer Treatment and Diagnosis, NCI                 |
| Molecular Oncology             | Roy Tarnuzzer PhD             | Center for Cancer Genomics, NCI                                 |
| Molecular Oncology             | Chris Karlovich, PhD          | Frederick National Laboratory for Cancer Research, Frederick MD |
| Radiology and Nuclear Medicine | Brian Rodgers MD              | Division of Cancer Treatment and Diagnosis, NCI                 |
| Ethics                         | Carol Weil JD                 | Division of Cancer Treatment and Diagnosis, NCI                 |

Supplemental Table 2: categories of consent for patients who had died or had been lost to follow-up

| Category | Requirements                                                                                                                                                                                                                                                                       | Use of tissue for ER?                                                                                                                                                                                                                                                                                                                                                                                                                                                                                                                                                                                                                                                                                                                                                                                                                                                                                                                                                                                                                                                                                                                                                                                                                                                                                |
|----------|------------------------------------------------------------------------------------------------------------------------------------------------------------------------------------------------------------------------------------------------------------------------------------|------------------------------------------------------------------------------------------------------------------------------------------------------------------------------------------------------------------------------------------------------------------------------------------------------------------------------------------------------------------------------------------------------------------------------------------------------------------------------------------------------------------------------------------------------------------------------------------------------------------------------------------------------------------------------------------------------------------------------------------------------------------------------------------------------------------------------------------------------------------------------------------------------------------------------------------------------------------------------------------------------------------------------------------------------------------------------------------------------------------------------------------------------------------------------------------------------------------------------------------------------------------------------------------------------|
| 1        | Patient (currently either alive or deceased) previously indicated in a consent form (at the time the tissue that will be used for the Exceptional Responders Initiative was collected) that his or her tissue and data could be used for <i>future medical or disease research</i> | <p>YES, this <i>tissue and associated medical data may be used</i>.</p> <p><i>Justification:</i> Current cutting-edge scientific research across all diseases includes investigation of the molecular biology of the disease through “omic” sequencing of tissue to determine underlying causal mutations. The Exceptional Responder’s Initiative is sequencing samples to find the potential underlying characteristics of a tumor that led a patient to have an exceptional response to an agent that failed to produce a response in most other patients.</p>                                                                                                                                                                                                                                                                                                                                                                                                                                                                                                                                                                                                                                                                                                                                     |
| 2        | Patient (currently either alive or deceased) previously indicated in a consent form that his or her tissue could be used for <i>future cancer research</i> .                                                                                                                       | <p>YES, this <i>tissue and associated medical data may be used</i>.</p> <p><i>Justification:</i> The current state of cancer research has a strong focus on developing targeted agents and providing personalized medicine to treat patients. As cancer is a disease of the genome, permission to use tissue and data for cancer research logically includes permission to conduct the genome sequencing contemplated in this study.</p>                                                                                                                                                                                                                                                                                                                                                                                                                                                                                                                                                                                                                                                                                                                                                                                                                                                             |
| 3        | Patient (currently alive) had not previously indicated that his or her tissue could be used for future research, but indicated he or she could be re-contacted                                                                                                                     | <p>MAYBE, if <i>patient is alive</i>, attempt will be made to contact the patient and consent will be sought for this study with the Exceptional Responders Initiative consent form. If the patient consents to have his or her tissue used for this study, the <i>tissue and case would be included</i> as part of this study. If the patient refuses consent for this study, his or her tissue would not be included. If the patient is lost to follow-up, the IRB may consider waiving consent</p> <p><i>Justification:</i> Patient gave permission to be re-contacted for potential inclusion in future studies. If patient is re-contacted and agrees to be included in this study, he or she will have done so knowing the full details of the study as conveyed in the informed consent. If it is impracticable to contact the patient, it may be possible to waive consent.</p> <p>NO, if the <i>patient is deceased</i>, this case would not be included in the Exceptional Responders Study.</p> <p><i>Justification:</i> These patients did not want their tissue used without being provided a specific opportunity to be informed of future research studies and to decide based on that specific study information whether to participate. Therefore, it would be unethical to use</p> |

|   |                                                                                                                                                                                                                |                                                                                                                                                                                                                                                                                                                                                                                                                                                                                                                                                                                                                                                                                                                                                                                                                                                    |
|---|----------------------------------------------------------------------------------------------------------------------------------------------------------------------------------------------------------------|----------------------------------------------------------------------------------------------------------------------------------------------------------------------------------------------------------------------------------------------------------------------------------------------------------------------------------------------------------------------------------------------------------------------------------------------------------------------------------------------------------------------------------------------------------------------------------------------------------------------------------------------------------------------------------------------------------------------------------------------------------------------------------------------------------------------------------------------------|
|   |                                                                                                                                                                                                                | such patients' tissue for ER or try to re-contact their family members.                                                                                                                                                                                                                                                                                                                                                                                                                                                                                                                                                                                                                                                                                                                                                                            |
| 4 | Patient (currently alive or deceased) had previously indicated in prior consents that their <i>tissue could not be used for future cancer</i> or disease research and that they could not be re-contacted      | NO, their tissue and <i>case would not be included</i> as part of this study.<br><i>Justification:</i> Patient did not want their tissue used for any future research and did not want to be contacted.                                                                                                                                                                                                                                                                                                                                                                                                                                                                                                                                                                                                                                            |
| 5 | <i>Patient is deceased</i> ; prior consent did not indicate whether the tissue collected could be used for future research. The prior consent also did not indicate whether the patient could be re-contacted. | YES, tissue may be used for this project.<br><i>Justification:</i> Patient is deceased so secondary use would not constitute human subject research. In addition, use of the tissue does not violate a known preference of the patient regarding re-contact or regarding any limitations on use of the tissue for research purposes.                                                                                                                                                                                                                                                                                                                                                                                                                                                                                                               |
| 6 | <i>Patient is alive</i> ; prior consent did not indicate whether the tissue collected could be used for future research. The prior consent also did not indicate whether the patient could be re-contacted.    | MAYBE, the patient would be contacted if possible and asked for his or her consent to use tissue for this study. If the patient consents to have his or her tissue used for this study, the <i>tissue and case would be included</i> as part of this study. If the patient refuses to consent for this study, the patient's <i>tissue would not be included</i> . If the patient cannot be reached, waiver of informed consent would be requested to use the tissue.<br><i>Justification:</i> If patient is alive, it is considered human subjects research and the patient will need to provide consent for this study, or else an IRB may waive consent under 45 CFR 46.116(d) <sup>1</sup> . If a patient cannot be reached after an effort to re-contact is made, the research meets the criteria for waiver set forth under 45 CFR 46.116(d). |

Supplemental Table 3: Type and duration of exceptional response (complete response (CR) or partial response (PR)) in 117 patients

| Ordinal list of cases by tumor type | Age range, sex | Tumor                           | Treatment Regimen                                                                                               | Response and duration | Clinical trial | Additional clinical information                                                                                        | Type of ER                                                                            |
|-------------------------------------|----------------|---------------------------------|-----------------------------------------------------------------------------------------------------------------|-----------------------|----------------|------------------------------------------------------------------------------------------------------------------------|---------------------------------------------------------------------------------------|
| Colorectal cancer                   |                |                                 |                                                                                                                 |                       |                |                                                                                                                        |                                                                                       |
| 1                                   | 70-80, F       | Metastatic colon adenocarcinoma | irinotecan<br>bevacizumab                                                                                       | CR 22+ months         | No             | MSI-H;<br>pelvic mesenteric implant 7 months post-surgery + adjuvant chemotherapy                                      | Expected CR rate < 10% (21)                                                           |
| 2                                   | 50-60, M       | Metastatic colon adenocarcinoma | 5-fluorouracil<br>leucovorin<br>oxaliplatin<br>bevacizumab and cyto-reductive surgery with mitomycin C<br>HIPEC | CR 9 + months         | No             | Metastases at initial diagnosis in lung, liver, adrenal; extensive adenopathy; large cecal mass; peritoneal metastases | CR < 10% expert opinion of reviewers                                                  |
| 3                                   | 40-50, F       | Metastatic colon adenocarcinoma | 5-fluorouracil<br>leucovorin<br>oxaliplatin<br>bevacizumab                                                      | CR 14 months          | NCT 00070122   | Liver metastases                                                                                                       | Expected CR rate < 10% (22)                                                           |
| 4                                   | 50-60, F       | Metastatic colon adenocarcinoma | irinotecan<br>capecitabine<br>bevacizumab                                                                       | CR 24 months          | No             | Pelvic mass                                                                                                            | Expected CR rate < 10% (23)                                                           |
| 5                                   | 50-60, M       | Metastatic colon adenocarcinoma | 5-fluorouracil<br>leucovorin<br>oxaliplatin<br>bevacizumab                                                      | CR 112 months         | No             | Liver metastases                                                                                                       | Expected CR rate < 10% and response duration > 3 x published median (7.3 months) (22) |
| 6                                   | 50-60, F       | Metastatic colon adenocarcinoma | irinotecan<br>5-fluorouracil<br>leucovorin<br>bevacizumab                                                       | CR 75 months          | No             | Hilar nodes, retroperitoneal adenopathy; lung nodules                                                                  | Expected CR rate < 10% and response duration > 3X median progression                  |

|    |          |                                 |                                                                              |              |                                                     |                                                                              |                                                                                           |
|----|----------|---------------------------------|------------------------------------------------------------------------------|--------------|-----------------------------------------------------|------------------------------------------------------------------------------|-------------------------------------------------------------------------------------------|
|    |          |                                 |                                                                              |              |                                                     |                                                                              | free duration (10.6 months) (24)                                                          |
| 7  | 60-70, M | Metastatic colon adenocarcinoma | 5-fluorouracil + leucovorin (change to capecitabine) oxaliplatin bevacizumab | CR 66 months | No                                                  | Peritoneal nodules; hilar masses                                             | Expected CR rate < 10% and response duration > 3x published median (7.3 months). (22, 25) |
| 8  | 60-70, F | Metastatic colon adenocarcinoma | 5-fluorouracil leucovorin, oxaliplatin bevacizumab                           | CR 9 months  | No                                                  | Metastases left hilum, liver, abdominal nodes                                | Expected CR rate < 10% (22)                                                               |
| 9  | 40-50, F | Metastatic colon adenocarcinoma | capecitabine oxaliplatin bevacizumab                                         | CR 49 months | On clinical trial; trial too old to have NCT number | Prior treatment HIPEC + debulking; progressed with multiple liver metastases | Expected CR rate < 10% and response duration > 3x published median (9.6 months) (26)      |
| 10 | 60-70, M | Metastatic colon adenocarcinoma | 5-fluorouracil leucovorin oxaliplatin bevacizumab                            | CR 54 months | No                                                  | Multifocal liver and nodal metastases; KRAS mutation                         | Expected CR rate < 10% and response duration > 3x published median (9.4 months) (27)      |
| 11 | 50-60, F | Metastatic colon adenocarcinoma | 5-fluorouracil leucovorin irinotecan bevacizumab                             | CR 48 months | No                                                  | Supraclavicular and retrocaval adenopathy 2 <sup>nd</sup> line               | Expected CR rate < 10% and response duration > 3x published median (3.2 months) (28)      |
| 12 | 60-70, M | Metastatic colon adenocarcinoma | 5-fluorouracil leucovorin oxaliplatin                                        | CR 5 months  | No                                                  | Liver metastases                                                             | Expected CR rate < 10%. (29)                                                              |

|    |          |                                  |                                                                                                                                                                                                                 |                  |                                                                        |                                                                                                                                                                                                             |                                                                                                        |
|----|----------|----------------------------------|-----------------------------------------------------------------------------------------------------------------------------------------------------------------------------------------------------------------|------------------|------------------------------------------------------------------------|-------------------------------------------------------------------------------------------------------------------------------------------------------------------------------------------------------------|--------------------------------------------------------------------------------------------------------|
|    |          |                                  | cetuximab                                                                                                                                                                                                       |                  |                                                                        |                                                                                                                                                                                                             |                                                                                                        |
| 13 | 60-70, F | Metastatic colon adenocarcinoma  | 5 cycles:<br>5-fluorouracil<br>leucovorin<br>oxaliplatin<br>Then<br>Exploratory<br>laparotomy,<br>debulking<br>showing no<br>evidence of<br>disease,<br>mitomycinC<br>intraperi-<br>toneal<br>chemo-<br>therapy | CR 13<br>months  | No                                                                     | Peritoneal<br>metastases;<br>CR after 4 cycles<br>of 5-fluorouracil,<br>leucovorin,<br>oxaliplatin                                                                                                          | Expected CR<br>rate < 10% (30)                                                                         |
| 14 | 60-70, F | Metastatic colon adenocarcinoma  | 5-fluorouracil<br>leucovorin<br>oxaliplatin<br>irinotecan<br>bevacizumab                                                                                                                                        | CR 40<br>months  | No                                                                     | Liver metastases<br>at diagnosis; right<br>hepatectomy after<br>chemotherapy;<br>long periods<br>without<br>progression but<br>had several local<br>treatments for<br>oligo-metastases<br>to liver and lung | Expected CR<br>rate < 10%.<br>(31,32)                                                                  |
| 15 | 60-70, M | Metastatic colon adenocarcinoma  | capecitabine<br>5 years                                                                                                                                                                                         | CR 128<br>months | On clinical<br>trial (1997);<br>trial too old<br>to have NCT<br>number | Liver metastases                                                                                                                                                                                            | Expected CR<br>rate < 10% and<br>response<br>duration > 3x<br>published<br>median (5.2<br>months) (33) |
| 16 | 40-50, F | Metastatic rectal adenocarcinoma | 5-fluorouracil<br>leucovorin<br>oxaliplatin<br>bevacizumab<br>x 7 months<br>followed by<br>radiotherapy<br>/<br>capecitabine<br>followed by<br>capecitabine<br>+                                                | CR 26<br>months  | No                                                                     | Liver metastasis                                                                                                                                                                                            | Expert opinion:<br>expected CR<br>rate < 10%<br>(primary and<br>metastatic<br>disease) (34)            |

|    |          |                                 |                                                                                     |               |              |                                                                                                                                                                                           |                                                                                        |
|----|----------|---------------------------------|-------------------------------------------------------------------------------------|---------------|--------------|-------------------------------------------------------------------------------------------------------------------------------------------------------------------------------------------|----------------------------------------------------------------------------------------|
|    |          |                                 | bevacizumab X 3 months followed by resection with no pathologic evidence of disease |               |              |                                                                                                                                                                                           |                                                                                        |
| 17 | 40-50, M | Rectal adenocarcinoma           | 5-fluorouracil leucovorin oxaliplatin bevacizumab then maintenance bevacizumab      | CR 52 months  | No           | Prior treatment with neoadjuvant Chemo-radiotherapy and excision; Subsequent increase in CEA with increased external Iliac and inguinal adenopathy; Stopped oxaliplatin for neurotoxicity | Expected CR rate < 10% (35)                                                            |
| 18 | 60-70, F | Metastatic colon adenocarcinoma | 5-fluorouracil leucovorin oxaliplatin bevacizumab                                   | PR 122 months | No           | Liver metastases; Abdominal lymphadenopathy 2 months post curative resection of primary tumor                                                                                             | Response duration > 3x published median (7.3 months) (22)                              |
| 19 | 50-60, M | Metastatic colon adenocarcinoma | 5-fluorouracil leucovorin oxaliplatin cetuximab                                     | PR 53 months  | NCT 00265850 | Liver metastases; Abdominal lymphadenopathy                                                                                                                                               | Response duration > 3x published median (12.3 months) (29)                             |
| 20 | 60-70, M | Metastatic colon adenocarcinoma | temozolomide TRC102 (methoxyamine hydrochloride)                                    | PR 27 months  | NCT 01851369 | Lung metastases; retroperitoneal and supraclavicular adenopathy                                                                                                                           | Response duration longer than expected (2-3 months). Expert opinion, no published data |
| 21 | 70-80, M | Metastatic colon adenocarcinoma | capecitabine                                                                        | PR 26+ months | No           | 8 months post resection; lung metastases and subcutaneous metastases                                                                                                                      | Response duration > 3x published median (7.2 months) (33)                              |

|                          |          |                                                  |                                                                                                 |                                                                               |                                                                                                |                                                                                                       |                                                                                                                                       |
|--------------------------|----------|--------------------------------------------------|-------------------------------------------------------------------------------------------------|-------------------------------------------------------------------------------|------------------------------------------------------------------------------------------------|-------------------------------------------------------------------------------------------------------|---------------------------------------------------------------------------------------------------------------------------------------|
| 22                       | 20-30, F | Metastatic colon adenocarcinoma                  | irinotecan<br>fluorouracil<br>leucovorin<br>first with<br>bevacizumab<br>then with<br>cetuximab | PR 18<br>months<br>(potenti<br>al CR<br>with<br>imaging<br>abnorm<br>alities) | NCT<br>00911170<br>On protocol<br>only 2<br>months<br>(evaluation<br>of pegfigras<br>tim only) | MSS; no <i>KRAS</i><br>mutation;<br>Massive Liver<br>metastases;<br>chemotherapy<br>duration 3 months | Expected CR<br>rate < 10%<br>Median<br>published PFS<br>10.4 months<br>(24)                                                           |
| Gastro-esophageal cancer |          |                                                  |                                                                                                 |                                                                               |                                                                                                |                                                                                                       |                                                                                                                                       |
| 23                       | 70-80, M | Metastatic<br>gastroesophageal<br>adenocarcinoma | MK-2206                                                                                         | CR 15<br>months                                                               | NCT<br>01260701                                                                                | 2 <sup>nd</sup> line<br>liver metastases;<br>peripancreatic<br>adenopathy                             | Published CR<br>rate < 1% (36)                                                                                                        |
| 24                       | 60-70, M | Metastatic<br>gastroesophageal<br>adenocarcinoma | paclitaxel<br>carboplatin                                                                       | CR 104<br>months                                                              | No                                                                                             | Liver metastases<br>9 courses of<br>chemotherapy<br>then stopped.                                     | Response<br>duration > 3 x<br>published<br>median (5.3<br>months) (37-n)                                                              |
| 25                       | 50-60, M | Metastatic<br>gastroesophageal<br>adenocarcinoma | cisplatin<br>5-fluorouracil<br>epirubicin<br>oxaliplatin<br>capecitabine                        | CR 49<br>months                                                               | No                                                                                             | Metastasis to right<br>supraclavicular,<br>mediastinal and<br>retroperitoneal<br>nodes                | Expected CR<br>rate < 10% (38)                                                                                                        |
| 26                       | 70-80, M | Metastatic<br>gastroesophageal<br>adenocarcinoma | 5-fluorouracil<br>leucovorin<br>oxaliplatin                                                     | CR 22+<br>months                                                              | No                                                                                             | Liver metastases                                                                                      | Expected CR<br>rate is < 10%<br>and response<br>duration > 3 x<br>published<br>median (6<br>months in<br>patients > 65<br>years) (39) |
| 27                       | 60-70, M | Metastatic<br>gastroesophageal<br>adenocarcinoma | capecitabine<br>oxaliplatin<br>epirubicin                                                       | CR 40<br>months                                                               | No                                                                                             | Liver metastases                                                                                      | Expected CR<br>rate < 10% (38)                                                                                                        |
| 28                       | 40-50, M | Metastatic<br>gastroesophageal<br>adenocarcinoma | cisplatin<br>capecitabine<br>trastuzumab                                                        | CR 50<br>months                                                               | No                                                                                             | <i>ERBB2</i><br>amplification<br>Lymphadenopathy                                                      | Expected CR<br>rate < 10% and<br>response<br>duration > 3X<br>published<br>median PFS (6.7<br>months) (40)                            |

|    |          |                                             |                                                            |              |    |                                                                                                                                                                                                                  |                                                                                             |
|----|----------|---------------------------------------------|------------------------------------------------------------|--------------|----|------------------------------------------------------------------------------------------------------------------------------------------------------------------------------------------------------------------|---------------------------------------------------------------------------------------------|
| 29 | 50-60, M | Metastatic gastroesophageal adenocarcinoma  | oxaliplatin<br>capecitabine<br>epirubicin                  | CR 12 months | No | HER2 IHC 3+<br>Metastatic brain, liver, subcarinal, gastro-hepatic nodes. Patient presented with brain metastasis                                                                                                | Expected CR rate < 10% (38)                                                                 |
|    |          |                                             |                                                            |              |    | which were resected followed by whole brain radiotherapy; patient received definitive radiotherapy and concurrent weekly cisplatin + irinotecan to primary, followed by epirubicin, oxaliplatin and capecitabine |                                                                                             |
| 30 | 60-70, M | Metastatic gastroesophageal adenocarcinoma  | 5-fluorouracil<br>leucovorin<br>oxaliplatin                | CR 25 months | No | <i>ERBB2</i> amplified; Metastasis to bone, liver, retroperitoneal and mediastinal lymph nodes                                                                                                                   | Expected CR rate is < 10% and response duration > 3X published median PFS (6.7 months)(39)  |
| 31 | 60-70, M | Metastatic gastroesophageal adenocarcinoma  | capecitabine<br>oxaliplatin                                | CR 55 months | No | 2 <sup>nd</sup> line recurrent metastatic disease<br>HER2 negative by IHC and FISH;                                                                                                                              | Expected CR rate < 10% and response duration > 3X published median PFS (6.7 months) (39,41) |
| 32 | 40-50, M | Metastatic gastroesophageal adenocarcinoma, | 5-fluorouracil<br>leucovorin<br>oxaliplatin<br>trastuzumab | CR 13 months | No | <i>ERBB2</i> amplification; retroperitoneal adenopathy                                                                                                                                                           | Expected CR rate < 10% (40)                                                                 |
| 33 | 50-60, M | Metastatic gastroesophageal adenocarcinoma  | 5-fluorouracil<br>leucovorin<br>oxaliplatin<br>trastuzumab | PR 20 months | No | <i>ERRB2</i> amplification; liver metastases.                                                                                                                                                                    | Response duration > 3X published median (6.7 months) (40)                                   |

|    |          |                                                                   |                                                           |                   |                 |                                                                                                                 |                                                                          |
|----|----------|-------------------------------------------------------------------|-----------------------------------------------------------|-------------------|-----------------|-----------------------------------------------------------------------------------------------------------------|--------------------------------------------------------------------------|
| 34 | 70-80, F | Metastatic gastroesophageal adenocarcinoma                        | 5-fluorouracil<br>leucovorin<br>oxaliplatin               | PR 13 +<br>months | NCT<br>01498289 | Liver metastases                                                                                                | Response ongoing, duration nearly 3 x published median (5.8 months) (39) |
| 35 | 40-50, M | Metastatic gastroesophageal adenocarcinoma                        | 5-fluorouracil<br>leucovorin<br>oxaliplatin               | PR 24+<br>months  | No              | HER2 expression negative;<br>Lung metastases;<br>para-aortic lymphadenopathy                                    | Response duration > 3 x published median (5.8 months) (39)               |
| 36 | 70-80, M | Metastatic gastroesophageal adenocarcinoma                        | 5-fluorouracil<br>leucovorin<br>oxaliplatin<br>vismodegib | PR 21<br>months   | NCT<br>00982592 | Liver metastases                                                                                                | Response duration > 3 x published median (5.8 months) (39)               |
| 37 | 60-70, M | Metastatic gastroesophageal adenocarcinoma                        | docetaxel<br>cisplatin<br>radiation                       | PR 128<br>months  | No              | Lymphadenopathy ; Tumor recurred and again treated with chemo-radiation                                         | Response duration > 3x published median (24 months) (42)                 |
| 38 | 70-80, M | Metastatic gastroesophageal adenocarcinoma                        | 5-fluorouracil<br>leucovorin<br>irinotecan                | PR 14<br>months   | No              | HER2 IHC 1+<br>2 <sup>ND</sup> line                                                                             | Response duration > 3 x expected (expert opinion)                        |
| 39 | 60-70, M | Metastatic gastroesophageal adenocarcinoma<br><i>ERBB2</i> normal | 5-fluorouracil<br>leucovorin<br>oxaliplatin               | PR 17<br>months   | No              | HER2neu IHC 1+<br>liver metastasis;<br>lymphadenopathy                                                          | Response duration > 3 x published median (5.8 months) (39)               |
| 40 | 50-60, F | Metastatic gastroesophageal adenocarcinoma                        | 5-fluorouracil<br>oxaliplatin<br>leucovorin               | PR 40<br>months   | No              | No <i>ERBB2</i> amplification;<br>Liver metastases;<br>mild lymphadenopathy;<br>gamma knife to brain metastases | Response duration > 3x published median (5.8 months) (39)                |

Lung Cancer

|    |          |                                             |                                                            |               |    |                                                                                                                      |                                                                                                                             |
|----|----------|---------------------------------------------|------------------------------------------------------------|---------------|----|----------------------------------------------------------------------------------------------------------------------|-----------------------------------------------------------------------------------------------------------------------------|
| 41 | 50-60, F | Metastatic lung adenocarcinoma              | docetaxel<br>bevacizumab                                   | CR 39 months  | No | 4 <sup>th</sup> line treatment;<br>pulmonary metastases                                                              | Expected CR rate < 10% and response duration > 3X published median PFS (5.9 months)(43)                                     |
| 42 | 80-90, M | Metastatic lung adenocarcinoma              | carboplatin<br>pemetrexed<br>and<br>pemetrexed maintenance | CR 28 months  | No | Lung mass;<br>lymphadenopathy                                                                                        | Response duration > 3X published median duration (4.44 months) (44)                                                         |
| 43 | 60-70, M | Metastatic lung adenocarcinoma              | afatinib                                                   | CR 4 months   | No | 1 <sup>st</sup> line;<br>deletion <i>EGFR</i> exon 19;<br>bone metastases;                                           | Expected CR rate < 10% (45)                                                                                                 |
| 44 | 60-70, M | Lung adenocarcinoma                         | paclitaxel<br>pemetrexed<br>bevacizumab                    | CR 69 months  | No | Right upper lobectomy prior to chemotherapy;<br>Recurrent:<br>lymphadenopathy                                        | Expected CR rate < 10% and response duration > 3x published median PFS (8 months)(46)                                       |
| 45 | 40-50, F | Metastatic lung adenocarcinoma              | paclitaxel<br>carboplatin<br>bevacizumab<br>erlotinib      | CR 129 months | No | Lung mass; hilar adenopathy<br>KRAS mutation neg<br>EGFR mutation neg<br><i>ALK</i> and <i>ROS</i> translocation neg | Expected CR rate < 10% and response duration > 3X published median time to progression for similar regimen (23.7 weeks)(47) |
| 46 | 60-70, F | Metastatic lung squamous cancer             | paclitaxel<br>carboplatin                                  | CR 41 months  | No | Left upper lobe lung mass; renal mass; liver metastasis; pelvic mass                                                 | Expected CR rate < 10% and response duration > 3X published PFS (5.6 months)(48)                                            |
| 47 | 40-50, F | Large cell neuroendocrine carcinoma of lung | carboplatin<br>etoposide                                   | CR 65 months  | No | Lung and mediastinal masses                                                                                          | Response duration > 3X published median (6.1-7.7 months) (49)                                                               |

|                      |          |                                  |                                          |                 |                 |                                                                                                                     |                                                                               |
|----------------------|----------|----------------------------------|------------------------------------------|-----------------|-----------------|---------------------------------------------------------------------------------------------------------------------|-------------------------------------------------------------------------------|
| 48                   | 50-60, F | Metastatic lung adenocarcinoma   | cisplatin<br>pemetrexed                  | PR 61<br>months | No              | Mediastinal and<br>liver metastases;<br>brain metastasis<br>at 35 months,<br>treated                                | Response<br>duration > 3x<br>published<br>median (4.1<br>months) (50)         |
| 49                   | 50-60, F | Metastatic lung adenocarcinoma   | carboplatin<br>pemetrexed                | PR 50<br>months | No              | Prior brain<br>radiotherapy for<br>metastasis; lung<br>mass; right hilar<br>nodes and liver<br>metastases           | Response<br>duration > 3x<br>published<br>median (4.1<br>months) (50)         |
| 50                   | 50-60, M | Metastatic lung adenocarcinoma   | cisplatin<br>pemetrexed<br>bevacizumab   | PR 36<br>months | No              | Ileocecal mass;<br>liver metastasis;<br>hilar mass;<br>adrenal<br>metastasis;<br>colectomy<br>provided<br>pathology | Response<br>duration > 3x<br>published<br>median (6-7.4<br>months)<br>(51,52) |
| 51                   | 50-60, M | Extensive small cell lung cancer | cisplatin<br>etoposide                   | PR 27<br>months | No              | Large right infra-hilar mass; chest lymphadenopathy ; few pulmonary masses; rib metastasis                          | Response<br>duration > 3x<br>published<br>median (5.2<br>months) (53)         |
| Gynecological Cancer |          |                                  |                                          |                 |                 |                                                                                                                     |                                                                               |
| 52                   | 40-50, F | Papillary serous ovarian cancer  | docetaxel<br>trabectedin                 | CR 18<br>months | NCT<br>00569673 | Peritoneal<br>carcinomatosis                                                                                        | Expected CR<br>rate < 10% (54)                                                |
| 53                   | 50-60, F | Serous adenocarcinoma of ovary   | paclitaxel<br>carboplatin<br>bevacizumab | CR 81<br>months | NCT<br>00262847 | Germline <i>BRCA1</i><br>mutation;<br>Liver metastases;<br>pelvic masses;<br>retroperitoneal<br>masses              | Response<br>duration > 3X<br>published<br>median (13.8<br>months) (55)        |
| 54                   | 80-90, F | Ovarian cancer NOS               | paclitaxel<br>carboplatin                | CR 69<br>months | No              | Stage IIIC<br>Adjuvant to<br>surgery                                                                                | Response<br>duration > 3X<br>published<br>median (19<br>months) (56)          |

|    |          |                                                       |                                                  |              |              |                                                                           |                                                                                                                                                                |
|----|----------|-------------------------------------------------------|--------------------------------------------------|--------------|--------------|---------------------------------------------------------------------------|----------------------------------------------------------------------------------------------------------------------------------------------------------------|
| 55 | 60-70, F | High grade serous papillary ovarian cancer Stage IIIB | paclitaxel carboplatin                           | CR 37 months | NCT 00108745 | Adjuvant to surgery                                                       | Response duration potentially >3x median published PFS (10-18 months) (56)                                                                                     |
| 56 | 20-30, F | Serous papillary ovarian cancer                       | bortezomib                                       | PR 19 months | NCT 00023712 | Liver metastasis; pelvic lymph nodes                                      | Partial response rate < 10% for this study (57)                                                                                                                |
| 57 | 20-30, F | Serous papillary ovarian                              | bevacizumab                                      | PR 63 months | No           | 4 <sup>th</sup> line; pleural, lung, liver metastasis                     | Response duration > 3x published median (4.7 months) (58)                                                                                                      |
| 58 | 30-40, F | Metastatic granulosa cell cancer of ovary             | temozolomide TRC102 (methoxamine hydrochloride)  | PR 20 months | NCT 01851369 | 7 prior systemic treatments and several prior surgeries; liver metastases | No published data; response duration considered > 3X median reported on clinical trials in patients with multiple prior treatments (2-3 months) Expert opinion |
| 59 | 40-50, F | Metastatic granulosa cell cancer of ovary             | temozolomide TRC 102 (methoxamine hydrochloride) | PR 10 months | NCT01851369  | 5 prior systemic treatments; bulky abdominal and pelvic masses            | No published data; response duration considered > 3X median reported on clinical trials in patients with multiple prior treatments (2-3 months) Expert opinion |

|    |          |                                                 |                                                                          |              |              |                                                                                 |                                                                                                                                      |
|----|----------|-------------------------------------------------|--------------------------------------------------------------------------|--------------|--------------|---------------------------------------------------------------------------------|--------------------------------------------------------------------------------------------------------------------------------------|
| 60 | 40-50, F | Small cell carcinoma ovary                      | vinblastine<br>bleomycin<br>cyclophosphamide<br>doxorubicin<br>etoposide | CR 90 months | No           | Stage IIIC;<br>complete surgical debulking and 7 cycles of chemotherapy         | Response duration > 3x median published survival (approximately 3 years with intensive chemotherapy) (59)                            |
| 61 | 50-60, F | Metastatic Endometrial papillary adenocarcinoma | paclitaxel<br>carboplatin                                                | CR 28 months | No           | Abdominal and pelvic masses;<br>liver metastasis;<br>retroperitoneal adenopathy | Expected CR rate < 10% and Response duration considered exceptional (expert opinion) (60, 61)                                        |
| 62 | 50-60, F | Metastatic endometrial endometrioid carcinoma   | paclitaxel<br>carboplatin<br>temsirolimus                                | CR 70 months | NCT 00977574 | Pelvic mass;<br>widespread lymphadenopathy                                      | Response duration > 3x longer than expected (expert opinion – median PFS 20 months for paclitaxel, carboplatin and bevacizumab) (62) |
| 63 | 70-80, F | Metastatic endometrial endometrioid carcinoma   | paclitaxel<br>nilotinib                                                  | PR 7 months  | NCT 02379416 | 4 <sup>th</sup> line;<br>Lung metastases                                        | Expected PR rate < 10% when patient had no response to prior 3 chemotherapy regimens (expert opinion)                                |

|            |          |                                                                 |                        |               |              |                                                                                                                                                                                                     |                                                                                     |
|------------|----------|-----------------------------------------------------------------|------------------------|---------------|--------------|-----------------------------------------------------------------------------------------------------------------------------------------------------------------------------------------------------|-------------------------------------------------------------------------------------|
| 64         | 60-70, F | Metastatic high grade papillary serous carcinoma fallopian tube | paclitaxel carboplatin | CR 75 months  | No           | Chemotherapy given after 3 <sup>rd</sup> debulking surgery; No evidence of disease at scan slightly more than a year post end of chemotherapy and at last visit approximately 7 years post chemo    | Response duration > 3x published median (10.4 months) (63)                          |
| 65         | 30-40, F | Squamous carcinoma cervix                                       | cisplatin gemcitabine  | CR 111 months | No           | Biopsy proven right hilar mass                                                                                                                                                                      | Expected CR rate < 10% (64)                                                         |
| 66         | 60-70, F | Leiomyosarcoma of uterus                                        | docetaxel gemcitabine  | CR 40+ months | No           | ER+; Lung metastases                                                                                                                                                                                | Expected CR rate < 10% (65)                                                         |
| CNS tumors |          |                                                                 |                        |               |              |                                                                                                                                                                                                     |                                                                                     |
| 67         | 30-40, M | oligoastrocytoma                                                | irinotecan             | CR 56 months  | No           | WHO grade III; recurrent; 1p, 10q deletions; no change to slight growth through 5 previous treatment regimens; irinotecan was 6 <sup>th</sup> regimen; slow decrease in size over time over 6 years | Expected CR rate < 10% (66)                                                         |
| 68         | 20-30, F | Glioblastoma multiforme                                         | irinotecan bevacizumab | CR 83 months  | No           | Stable imaging for 6 years                                                                                                                                                                          | Expected CR rate < 10% and duration of survival > 3X published median (8.7 mos)(67) |
| 69         | 20-30, F | Glioblastoma multiforme                                         | cabozantinib           | CR 60 months  | NCT 01068782 | Stable imaging for 5 years                                                                                                                                                                          | Expected CR rate < 10%; Duration PFS > 3X published median(3.7 months) (68)         |
| 70         | 60-70, F | Recurrent glioblastoma multiforme                               | cediranib cilengitide  | CR 70 months  | NCT 00979862 |                                                                                                                                                                                                     | Expected CR rate < 10%; Duration of survival > 3X published                         |

|    |          |                              |                               |               |              |                                                                                                                                           |                                                                     |
|----|----------|------------------------------|-------------------------------|---------------|--------------|-------------------------------------------------------------------------------------------------------------------------------------------|---------------------------------------------------------------------|
|    |          |                              |                               |               |              |                                                                                                                                           | median (6.5 months) (69, 70)                                        |
| 71 | 20-30, F | Glioblastoma multiforme      | temozolomide radiotherapy     | CR 117 months | No           | Subtotal resection; radiation and adjuvant temozolomide                                                                                   | Response duration > 3X published median survival (13.4 months) (71) |
| 72 | 70-80, M | Glioblastoma multiforme      | temozolomide and radiotherapy | CR 49 months  | NCT 01062399 | Temozolomide adjuvant; gross total resection and radiotherapy                                                                             | Response duration > 3x published median survival (71)               |
| 73 | 30-40, M | Glioblastoma multiforme      | irinotecan temozolomide       | CR 145 months | NCT 00099125 | Adjuvant to gross total resection and radiotherapy                                                                                        | Response duration > 3x published median survival (71)               |
| 74 | 40-50, F | Anaplastic oligo-astrocytoma | irinotecan bevacizumab        | PR 95 months  | No           | 2 <sup>nd</sup> line; recurrent after chemoradiation and surgery; deletion 1p36 in 38% of cells and deletion 19q13 in 38% of cells        | Response duration > 3 x published median PFS (4.2 months) (67)      |
| 75 | 70-80, M | Glioblastoma multiforme      | temozolomide                  | PR 100 months | No           | Adjuvant temozolomide; resection + carmustine implant + radiotherapy                                                                      | Response duration > 3x published median survival (4.7 months) (72)  |
| 76 | 50-60, M | Glioblastoma multiforme      | temozolomide                  | PR 162 months | No           | Recurred after resection + carmustine implant + radiotherapy; gross total resection + carmustine implant + radiotherapy and temozolomide. | Response duration > 3x published median PFS (4.7 months) (72)       |

| Breast cancer |          |                                  |                                                             |                          |                          |                                                                                                                                                        |                                                                     |
|---------------|----------|----------------------------------|-------------------------------------------------------------|--------------------------|--------------------------|--------------------------------------------------------------------------------------------------------------------------------------------------------|---------------------------------------------------------------------|
| 77            | 50-60, F | Metastatic breast adenocarcinoma | carboplatin<br>docetaxel<br>trastuzumab                     | CR 73 months             | No                       | 1 <sup>st</sup> line<br>ER negative, PR negative, <i>ERBB2</i> amplified; liver metastases                                                             | Response duration > 3x published median (12.4-14.4 months) (73, 74) |
| 78            | 50-60, F | Breast adenocarcinoma            | paclitaxel<br>trastuzumab and<br>capecitabine consolidation | CR 86 months             | No                       | Prior resection and adjuvant chemotherapy and radiation; ER negative, PR negative, HER2 IHC 3+; Recurrent: pulmonary metastases; lymph node metastases | Response duration > 3X median published PFS (12.4 months) (74)      |
| 79            | 60-70, F | Breast adenocarcinoma            | docetaxel<br>trastuzumab<br>letrozole                       | CR 82 months             | No                       | 1 <sup>st</sup> line<br>ER positive, PR positive, <i>ERBB2</i> amplified; Liver metastasis                                                             | Response duration > 3X median (12.4 – 14.4 months) (74)             |
| 80            | 53-60, F | Metastatic breast adenocarcinoma | trastuzumab<br>pertuzumab                                   | CR 36 months<br>Duration | NCT 01615068<br>Registry | ER+, PR+, <i>ERBB2</i> amplified by FISH<br>Lung and para-mediastinal masses; hilar adenopathy; breast mass                                            | Expected CR rate < 10% (75)                                         |

|    |          |                                  |                                                                     |                |              |                                                                                                                                                               |                                                                                                          |
|----|----------|----------------------------------|---------------------------------------------------------------------|----------------|--------------|---------------------------------------------------------------------------------------------------------------------------------------------------------------|----------------------------------------------------------------------------------------------------------|
| 1  | 50-60, F | Metastatic breast adenocarcinoma | capecitabine (discontinued after 3 months - intolerant) vinorelbine | CR 20 months   | No           | ER+, PR+, HER2 negative; had adjuvant chemotherapy and aromatase inhibitor; Liver metastases developed within 3 years; biopsy showed ER, PR and HER2 negative | Expected CR rate < 10% (76)                                                                              |
| 82 | 40-50, F | Metastatic breast adenocarcinoma | trastuzumab                                                         | CR 113+ months | No           | Metastatic at presentation ER neg; PR+, HER2 amplified by FISH; Liver metastasis (biopsy proven)                                                              | Expected CR rate < 10% and response duration > 3X published median time to progression (18.8 months)(77) |
| 83 | 50-60, F | Metastatic breast adenocarcinoma | Cyclophosphamide docetaxel anastrozole zoledronic acid              | PR 59 months   | No           | 1 <sup>st</sup> line; ER/PR positive, HER-2 negative, Ki-67 44%; Oncotype recurrence score 18; bone metastases; lung metastases; breast masses                | Response - duration > 3x published median (13.1 months) (78)                                             |
| 84 | 60-70, F | Metastatic breast adenocarcinoma | bevacizumab letrozole                                               | PR 87 months   | NCT 00601900 | ER and PR positive; lung and bone metastases                                                                                                                  | Response duration > 3x published median (20.2 months) on this study (79)                                 |

|          |          |                                  |                                          |               |              |                                                                                                                                                                                                      |                                                                                         |
|----------|----------|----------------------------------|------------------------------------------|---------------|--------------|------------------------------------------------------------------------------------------------------------------------------------------------------------------------------------------------------|-----------------------------------------------------------------------------------------|
| 85       | 60-70, F | Metastatic breast adenocarcinoma | capecitabine<br>trastuzumab              | PR 50 months  | No           | 2 primary breast cancers,<br>Metastatic to bone and liver at time of treatment                                                                                                                       | Response duration > 3x published median (14.4 months) (73)                              |
| 86       | 60-70, F | Metastatic breast adenocarcinoma | trastuzumab                              | PR 32 months  | No           | ER+, PR negative<br><i>ERBB2</i> amplified;<br>Bone metastases;<br>breast mass;<br>axillary adenopathy                                                                                               | Response duration longer than expected (18.8 months) (77)                               |
| Melanoma |          |                                  |                                          |               |              |                                                                                                                                                                                                      |                                                                                         |
| 87       | 30-40, F | Metastatic melanoma              | paclitaxel<br>carboplatin<br>bevacizumab | CR 66 months  | No           | 2 <sup>nd</sup> metastatic recurrence;<br>treated with resection and adjuvant interferon after 1 <sup>st</sup> recurrence;<br>Developed hilar nodes and lung metastasis;<br><i>BRAFV600</i> mutation | Expected CR rate < 10% and response duration > 3X median PFS (6 months) (80)            |
| 88       | 70-80, F | Metastatic melanoma              | dacarbazine                              | CR 23 months  | NCT 00864253 | Lung metastases                                                                                                                                                                                      | Expected CR rate < 10% and response duration > 3X published median PFS (1.6 months)(81) |
| 89       | 80-90, M | Metastatic melanoma              | ipilimumab                               | CR 4 months   | No           | No <i>BRAF</i> mutation;<br>Bone and liver metastases                                                                                                                                                | Expected CR rate < 10% (82)                                                             |
| 90       | 50-60, M | Metastatic truncal melanoma      | Ipilimumab                               | CR 37+ months | No           | Adjuvant high dose interferon previously;<br>Developed solitary liver metastasis;<br>disappeared on ipilimumab                                                                                       | Expected CR rate < 10% (82)                                                             |
| 91       | 70-80, M | Metastatic melanoma              | ipilimumab                               | PR 39 months  | No           | No <i>BRAF</i> mutation;<br>Pelvic and retroperitoneal lymph nodes; liver metastases                                                                                                                 | Response duration > 3 x published median (12-13 months) (82)                            |

|                   |          |                                           |                          |                       |              |                                                                                                                                                              |                                                                                     |
|-------------------|----------|-------------------------------------------|--------------------------|-----------------------|--------------|--------------------------------------------------------------------------------------------------------------------------------------------------------------|-------------------------------------------------------------------------------------|
| 92                | 60-70, M | Metastatic melanoma                       | ipilimumab               | PR/near CR; 19 months | No           | <i>BRAF</i> mutation; Subcutaneous and skin metastases                                                                                                       | Expected response rate < 10% (82)                                                   |
| Renal cancer      |          |                                           |                          |                       |              |                                                                                                                                                              |                                                                                     |
| 93                | 40-50, F | Metastatic clear cell carcinoma kidney    | sunitinib                | CR 25 months          | No           | Lung metastases and brain metastases (resected prior to treatment); subcarinal and hilar adenopathy; Chest wall metastases; abdominal metastases (diaphragm) | Expected CR rate < 10% (83)                                                         |
| 94                | 70-80, M | Metastatic clear cell carcinoma kidney    | sunitinib                | CR 74 months          | No           | Local progression and lung metastases                                                                                                                        | Expected CR rate < 10%; response duration >3x published median PFS (11 months) (83) |
| 95                | 60-70, M | Renal cell carcinoma, NOS                 | atezolizumab bevacizumab | CR 19 + months        | NCT 01984242 | Lung and supraclavicular node metastases                                                                                                                     | Expected CR rate < 10% (84)                                                         |
| 96                | 70-80, M | Metastatic clear cell carcinoma of kidney | temsirolimus             | PR 11 months          | No           | Lung and bone metastases                                                                                                                                     | Response duration > 3X published median PFS (3.8 months) (85)                       |
| 97                | 40-50, M | Renal cell carcinoma NOS                  | everolimus               | PR 37 months          | No           | Mass duodenum/head of pancreas biopsy proven metastasis                                                                                                      | Response duration > 3x median published (7.9 months) (86)                           |
| Urothelial cancer |          |                                           |                          |                       |              |                                                                                                                                                              |                                                                                     |
| 98                | 50-60, M | Metastatic bladder cancer (urothelial)    | Belinostat               | CR 12 + months        | NCT 01317927 | Mediastinal adenopathy                                                                                                                                       | CR rate on this trial < 10% (87)                                                    |

|                   |          |                                                  |                                                           |                   |                 |                                                                                                                                                               |                                                                                                               |
|-------------------|----------|--------------------------------------------------|-----------------------------------------------------------|-------------------|-----------------|---------------------------------------------------------------------------------------------------------------------------------------------------------------|---------------------------------------------------------------------------------------------------------------|
| 99                | 40-50, F | Metastatic bladder cancer (urothelial)           | cisplatin<br>gemcitabine<br>cetuximab                     | CR 75 +<br>months | NCT<br>00645593 | <i>HRAS</i> mutation;<br>Lung and liver<br>metastases<br>cetuximab added<br>after progression<br>on gemcitabine<br>and cisplatin, per<br>protocol             | Expected CR<br>rate < 10% and<br>response<br>duration > 3X<br>published PFS<br>(7.6<br>months)(88)            |
| 100               | 70-80, M | Metastatic bladder cancer (urothelial)           | nivolumab                                                 | CR 16+<br>months  | NCT<br>02387996 | Locally advanced<br>and liver<br>metastases                                                                                                                   | Expected CR<br>rate < 10% (89)                                                                                |
| 101               | 50-60, M | Metastatic bladder cancer (urothelial)           | paclitaxel<br>carboplatin<br>focal<br>radiation           | CR 64<br>months   | No              | Retroperitoneal<br>lymphadenopathy<br>Small cell<br>undifferentiated<br>carcinoma                                                                             | Response<br>duration > 3x<br>published<br>median (mean<br>survival 6–34.9<br>months) (90,<br>91)              |
| Pancreatic cancer |          |                                                  |                                                           |                   |                 |                                                                                                                                                               |                                                                                                               |
| 102               | 60-70, M | Pancreas adenocarcinoma with squamous metaplasia | 5-fluorouracil<br>leucovorin<br>oxaliplatin<br>irinotecan | CR 50<br>months   | No              | 1 <sup>st</sup> line;<br>Retroperitoneal<br>and mesenteric<br>lymphadenopathy<br>; porta hepatis<br>mass;<br>Chemotherapy<br>duration 3 months                | Expected CR<br>rate < 10% and<br>duration of<br>response > 3x<br>published PFS<br>(6 months)(92)              |
| 103               | 70-80, F | Metastatic pancreatic adenocarcinoma             | 5-fluorouracil<br>leucovorin<br>oxaliplatin               | CR 31<br>months   | No              | 1 <sup>st</sup> line;<br>Pancreatic mass<br>and biopsy proven<br>liver metastasis;<br>Surgery after<br>chemotherapy<br>found no evidence<br>of malignancy     | Expected CR<br>rate < 10% (93)                                                                                |
| 104               | 50-60, M | Metastatic pancreatic adenocarcinoma             | capecitabine                                              | PR 36<br>months   | No              | Found to have<br>liver metastases<br>at curative<br>surgery; this was<br>resected; started<br>adjuvant<br>capecitabine and<br>had 3 years until<br>recurrence | Response<br>duration > 3x<br>expected<br>(expert<br>opinion,<br>extrapolating<br>from published<br>data) (94) |
| Other cancers     |          |                                                  |                                                           |                   |                 |                                                                                                                                                               |                                                                                                               |

|     |          |                                              |                                              |                 |    |                                                                                                                                                                                      |                                                                                                                          |
|-----|----------|----------------------------------------------|----------------------------------------------|-----------------|----|--------------------------------------------------------------------------------------------------------------------------------------------------------------------------------------|--------------------------------------------------------------------------------------------------------------------------|
| 105 | 70-80, M | Unknown primary, "favor" bile duct carcinoma | cisplatin<br>gemcitabine                     | CR 20<br>months | No | Liver metastases;<br>thoracic,<br>supraclavicular<br>and<br>retroperitoneal<br>adenopathy                                                                                            | Expected CR<br>rate < 10% (96)<br>.                                                                                      |
| 106 | 60-70, M | Cholangio-<br>carcinoma                      | cisplatin then<br>carboplatin<br>gemcitabine | CR 21<br>months | No | Locally advanced<br>disease;<br>mediastinal,<br>supraclavicular,<br>mesenteric and<br>retroperitoneal<br>adenopathy;<br>Patient had only 3<br>months of<br>cisplatin/carbopla<br>tin | Expected CR<br>rate < 10% (97)                                                                                           |
| 107 | 50-60, M | Metastatic small<br>cell cancer of<br>colon  | cisplatin<br>etoposide                       | CR 59<br>months | No | Liver metastases;<br>right lower<br>quadrant<br>abdominal mass;<br>peritoneal<br>metastases, soft<br>tissue mass<br>anterior to<br>duodenum                                          | Response<br>duration<br>> 3x<br>the duration of<br>response<br>published. (99,<br>100)                                   |
| 108 | 50-60, F | Metastatic anal<br>cancer, squamous          | capecitabine                                 | PR 38<br>months | No | 2 <sup>nd</sup> line<br>Recurrent after<br>chemoradiation<br>with mitomycin C;<br>Liver and lung<br>metastases                                                                       | Response<br>duration<br>> 3X<br>published<br>median (3.2<br>months for 2 <sup>nd</sup><br>line<br>chemotherapy)<br>(101) |
| 109 | 70-80, F | Gastro-intestinal<br>Stromal tumor<br>(GIST) | sunitinib                                    | CR 8<br>months  | No | Recurrent post<br>resection and<br>adjuvant imatinib;<br>Right lower<br>quadrant<br>abdominal mass;<br>mesenteric<br>adenopathy;<br>peritoneal<br>metastases                         | Expected CR<br>rate < 10%<br>(102)                                                                                       |

|     |          |                                               |                                            |               |              |                                                                                                        |                                                                                                    |
|-----|----------|-----------------------------------------------|--------------------------------------------|---------------|--------------|--------------------------------------------------------------------------------------------------------|----------------------------------------------------------------------------------------------------|
| 110 | 30-40, F | Gastro-intestinal Stromal tumor (GIST)        | Imatinib                                   | CR 106 months | No           | Abdominal and pelvic metastases; PR to imatinib on recurrence;                                         | Expected CR rate < 10% and response duration >3X published time to progression (24 months) (103)   |
| 111 | 50-60, M | Metastatic papillary thyroid cancer           | PF-03084014 (gamma secretase inhibitor)    | CR 80 months  | NCT 00878189 | Lung and paratracheal metastases                                                                       | Patient was only complete responder and was treated at the lowest dose in this phase I trial (104) |
| 112 | 60-70, M | Merkel cell cancer, skin                      | topotecan                                  | PR 33 months  | No           | Liver and bone metastases<br>Prior cisplatin/carboplatin                                               | Response duration > 3x published median (2-3 months) (105)                                         |
| 113 | 60-70, M | head/neck squamous carcinoma                  | 5-fluorouracil<br>carboplatin<br>cetuximab | CR 18 months  | No           | 1 <sup>st</sup> line; p16+;<br>Biopsy proven bone metastasis at diagnosis;<br>No radiotherapy          | Response duration > 3x published median (5.6 months) (106)                                         |
| 114 | 40-50, F | Metastatic oropharynx squamous cell carcinoma | docetaxel<br>cisplatin<br>bevacizumab      | CR 53 months  | NCT 00588770 | p16+;<br>Prior definitive chemoradiation with cisplatin;<br>Lung metastases;<br>mediastinal adenopathy | Response duration > 3x published median (6-10 months) (107)                                        |
| 115 | 70-80, M | Adenocarcinoma unknown primary                | paclitaxel<br>carboplatin                  | CR 40+ months | No           | Lung and liver metastases                                                                              | Response duration > 3x Published median (median survival 15.5 months) (108)                        |
| 116 | 50-60, M | Metastatic castrate resistant prostate cancer | docetaxel<br>bevacizumab<br>thalidomide    | PR 94 months  | NCT 00089609 | 4 <sup>th</sup> line;<br>Bone metastases,<br>pelvic adenopathy                                         | Response duration > 3x published                                                                   |

|     |          |                         |                                                |              |    |                                 |                                                      |
|-----|----------|-------------------------|------------------------------------------------|--------------|----|---------------------------------|------------------------------------------------------|
|     |          |                         |                                                |              |    |                                 | median (approximately 6 months) (109)                |
| 117 | 80-90, F | Soft tissue sarcoma NOS | weekly doxorubicin and concurrent radiotherapy | PR 59 months | No | Lung metastases left thigh mass | Response duration > 3x published median (4.3 months) |

† 117 patients had sufficient nucleic acids for sequencing; Sequencing was unsuccessful in 6 cases; cases were grouped by tumor type; ages are grouped by decade to preserve anonymity; Abbreviations: HIPEC (Hyperthermic intraperitoneal chemotherapy); MSS (microsatellite stable); MSI (Microsatellite instability); NOS (not otherwise specified)
